# Supplementary figures and images for: Robotic Surgery: A Novel Approach for Breast Surgery and Reconstruction
Source: PubMed Central journal article supplement — Plast Reconstr Surg Glob Open. 2020 Jan 29;8(1):e2578. doi: 10.1097/GOX.0000000000002578 (PMC7015621; doi:10.1097/gox.0000000000002578), 2020-01-29

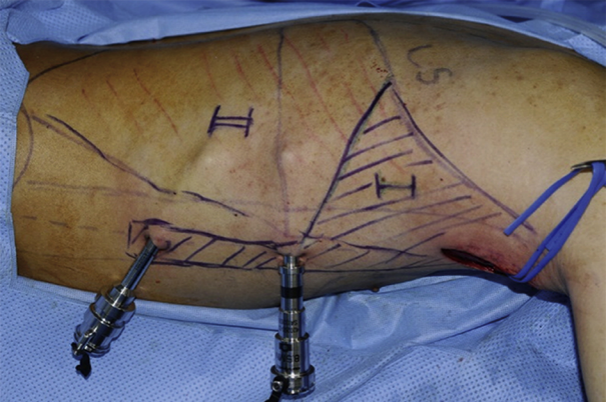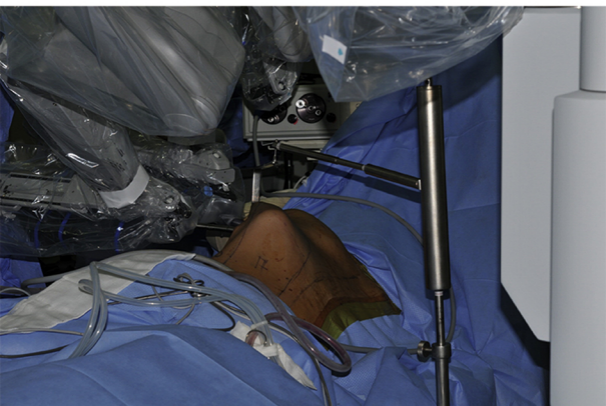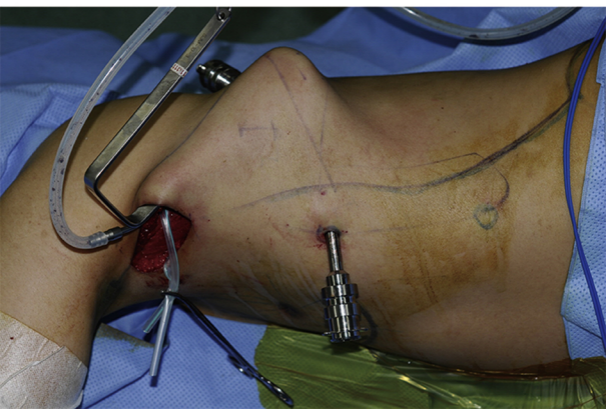

Supplement: gox-8-e2578-s001.pdf [file gox-8-e2578-s001.pdf]

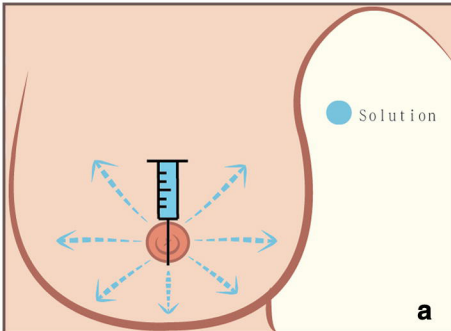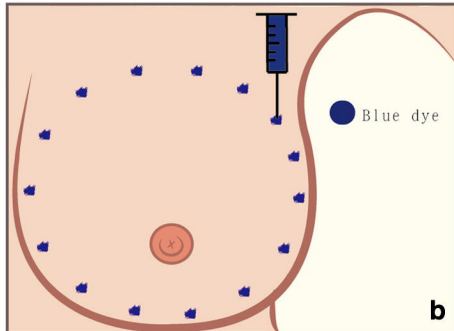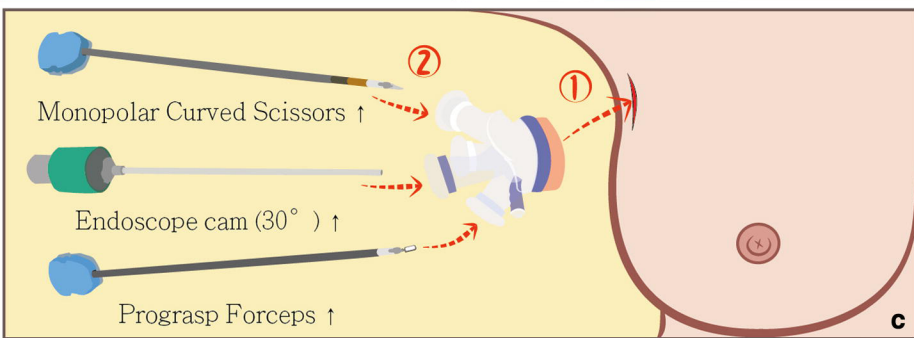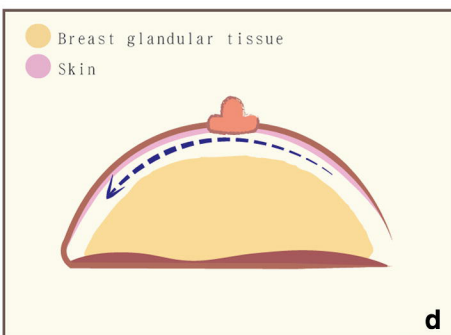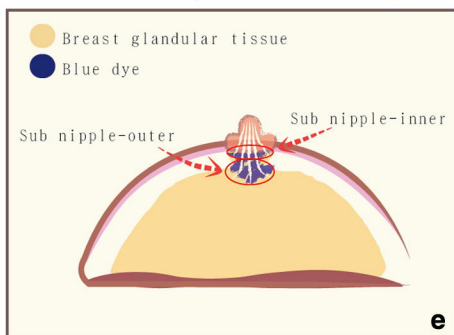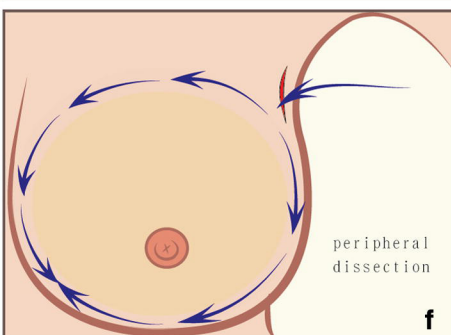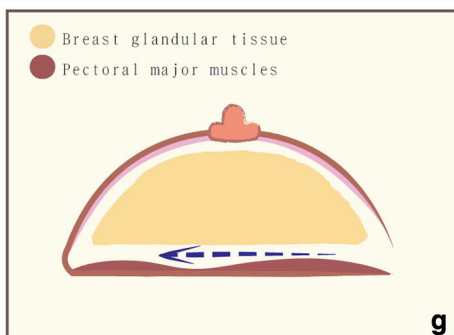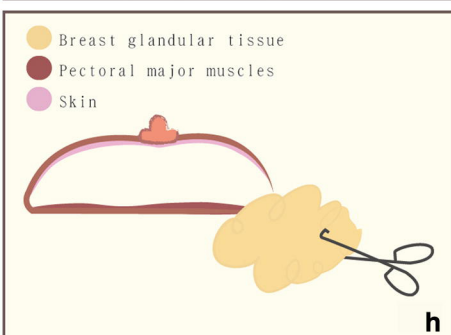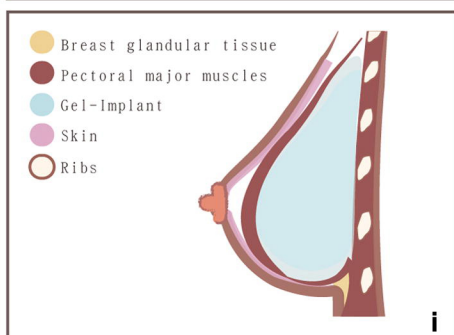

Supplement: gox-8-e2578-s002.pdf [file gox-8-e2578-s002.pdf]
